# Supplementary material
Source: PubMed Central journal article supplement (PMC4185218)
Supplement: NIHMS620446-supplement-1.pdf [file NIHMS620446-supplement-1.pdf]

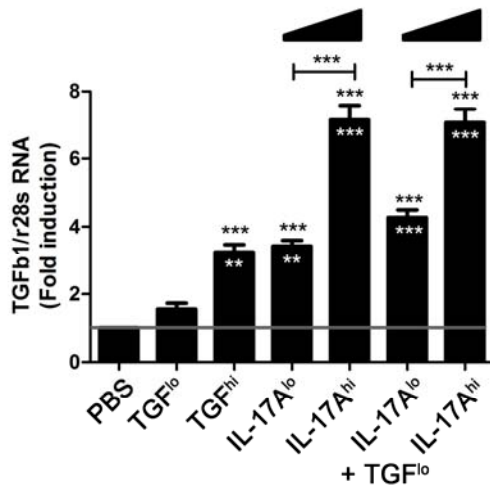

**Figure S1. IL-17A induces TGF-β1 expression in LX2 cells.**

Relative expression of TGF-β1 by LX2 cells after 48 h stimulation with IL-17A ± TGF-β was determined by quantitative PCR, and results are shown as fold change compared PBS- versus cytokines-treated LX2 cells.

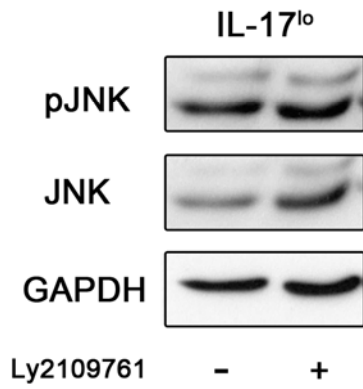

**Figure S2. TGF- $\beta$  inhibitor, Ly2109761, has no effect on IL-17A signaling.**

Ly2109761 doesn't inhibit phosphorylation of JNK induced by IL-17A, as shown by western blot following 15 min stimulation with IL17A<sup>lo</sup>.

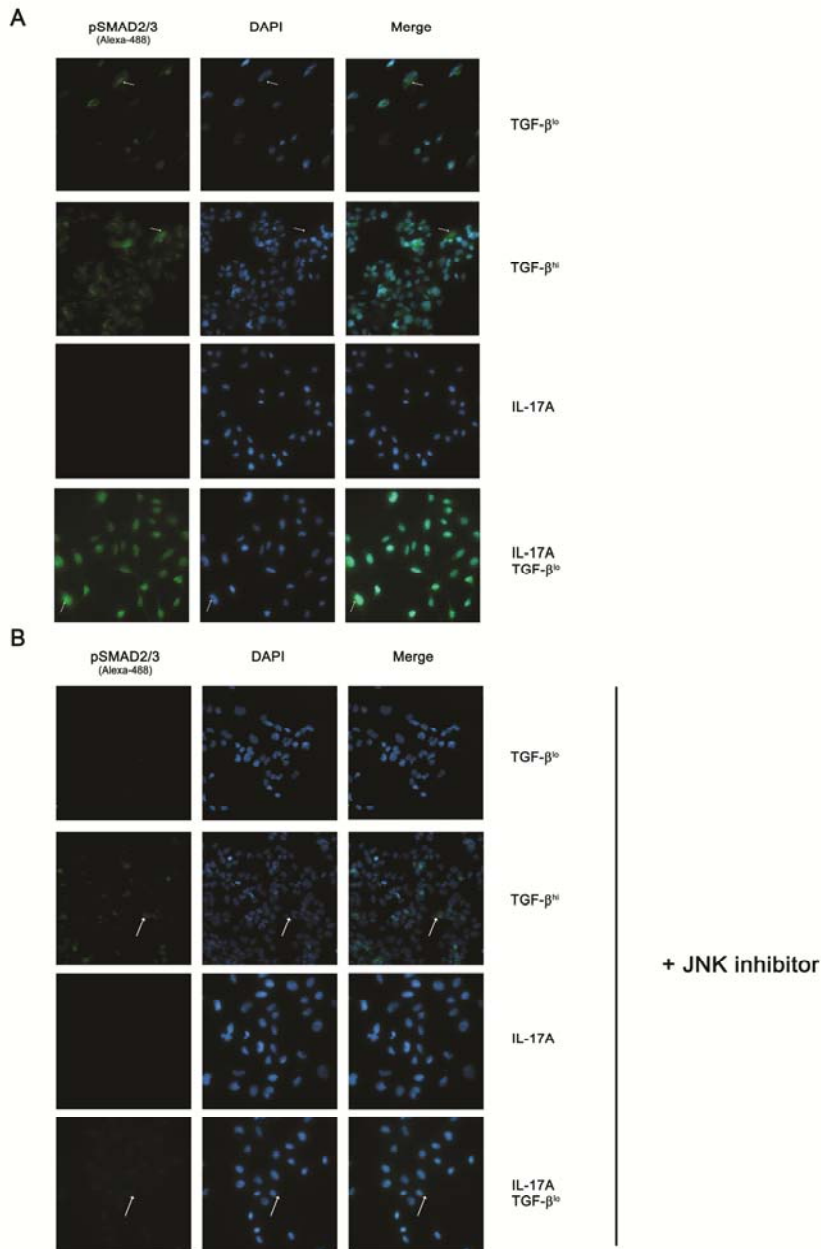

**Figure S3. Localization of phosphorylated SMAD2/3 in cytokines stimulated HSCs.**

Two colors immunofluorescence confocal microscopy was used to observe phosphorylated SMAD2/3 (green, Alexa-488) and nucleus (Blue, DAPI). Confocal images of untreated HSCs (A) or JNK-inhibitor SP600125 treated HSCs (B) are displayed. Panels A and B are representative of 3 independent experiments.
